# Supplementary material for: ERBB2 exon 20 insertions are rare in Brazilian non‐small cell lung cancer
Source: PubMed Central journal article supplement (PMC9715798; doi:10.1111/1759-7714.14605), 2022-10-17

**Supplementary Figure 1 – Distribution of patients from Barretos Cancer Hospital (n=722). Created using Microsoft Office Excel 2019**

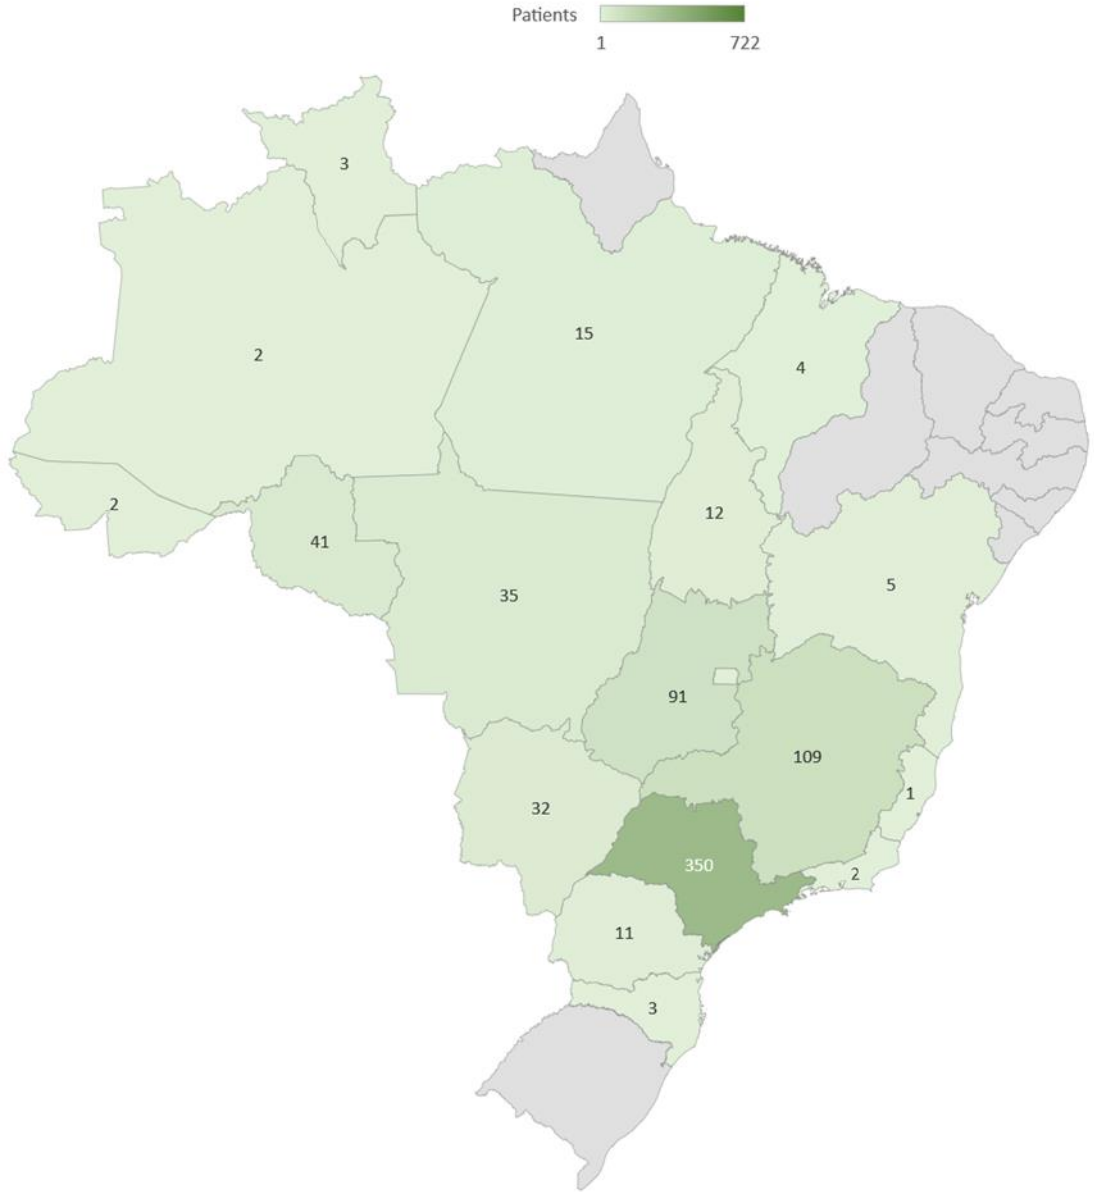

Supplement: TCA-13-3402-s002.pdf [file TCA-13-3402-s002.pdf]
